# Supplementary material for: Proteinortho: Detection of (Co-)orthologs in large-scale analysis
Source: Springer Nature journal article supplement (doi:10.1186/1471-2105-12-124), 2011-04-28

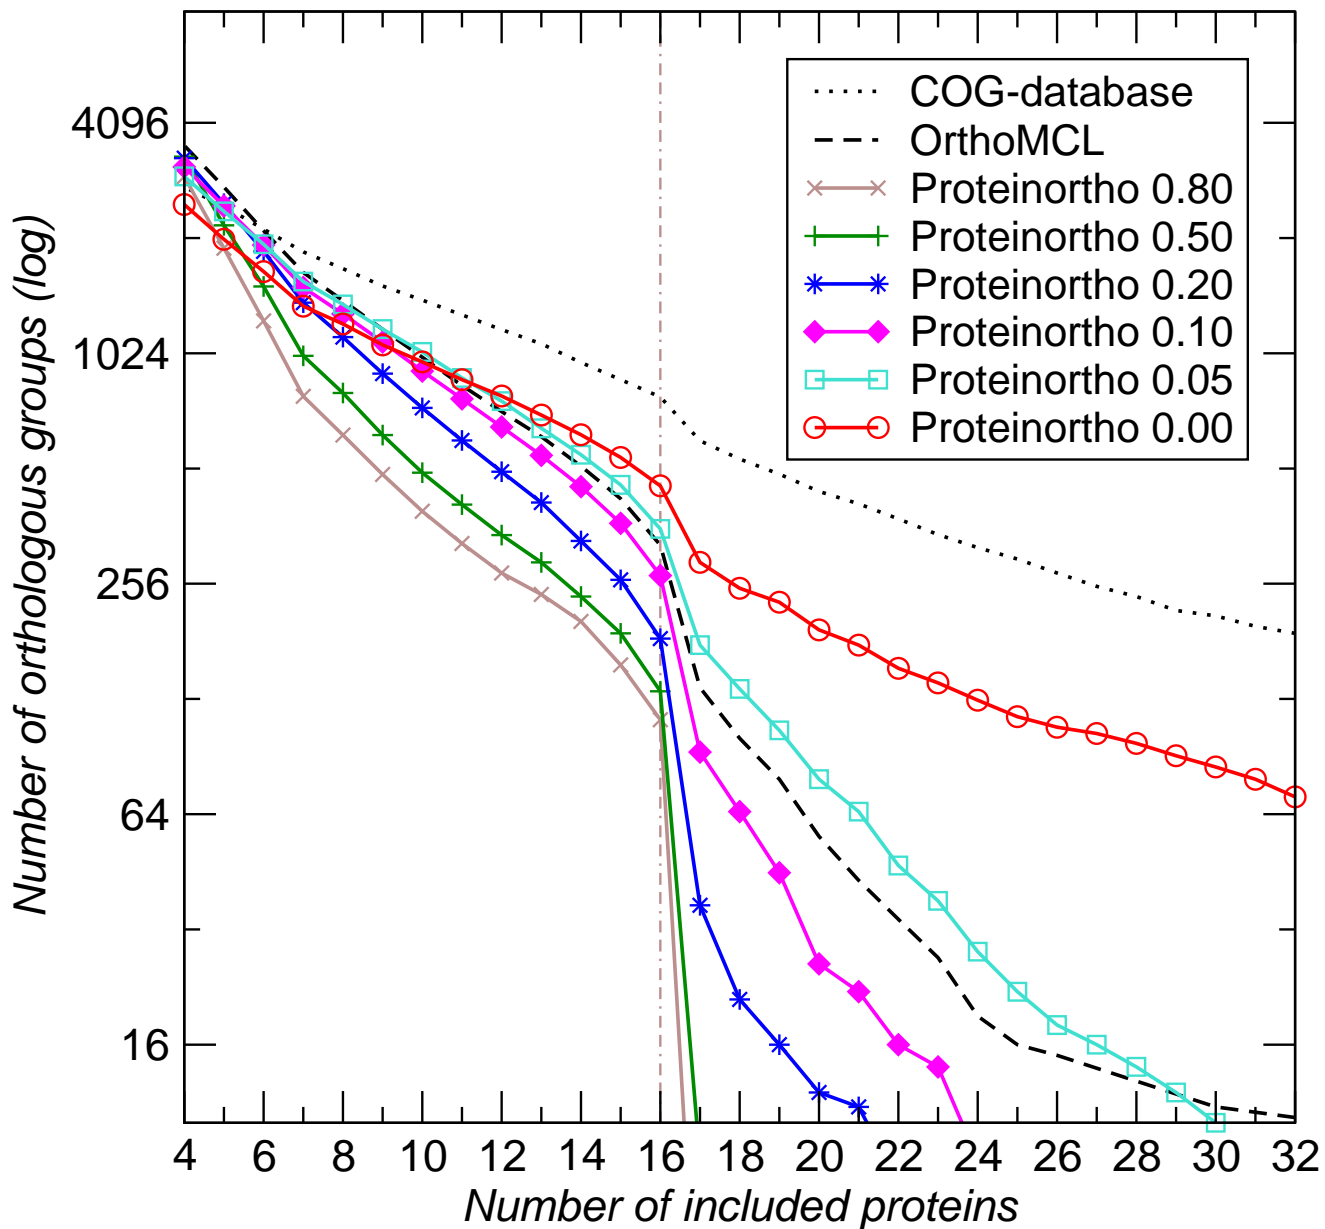

Supplement: 12859_2010_4535_MOESM7_ESM.pdf [file 12859_2010_4535_MOESM7_ESM.pdf]
